# Supplementary material
Source: PubMed Central journal article supplement (PMC10694858)
Supplement: NIHMS1847865-supplement-Supplemental_Material.pdf [file NIHMS1847865-supplement-Supplemental_Material.pdf]

Supplementary Table S1: *Baseline differences in demographic characteristics between coparents in the current study and non-coparents in the full sample*

| Variable                           | Non-coparent sample<br>(N = 356) | Coparent sample<br>(N = 272) | Difference                     |
|------------------------------------|----------------------------------|------------------------------|--------------------------------|
| Age                                | 34.54 (7.85)                     | 33.35 (6.36)                 | $t(623.85) = 2.10, p = .04$    |
| Race                               |                                  |                              | $\chi^2(4) = 1.51, p = .83$    |
| Non-Hispanic White                 | 62.4%                            | 65.4%                        |                                |
| Hispanic White                     | 6.7%                             | 4.8%                         |                                |
| Black                              | 17.4%                            | 15.8%                        |                                |
| Multiracial                        | 4.5%                             | 4.8%                         |                                |
| Other                              | 9.0%                             | 9.2%                         |                                |
| Ethnicity                          |                                  |                              | $\chi^2(1) = 1.99, p = .16$    |
| Hispanic/Latino(a)                 | 13.2%                            | 9.6%                         |                                |
| Relationship status                |                                  |                              | $\chi^2(2) = 55.09, p < .001$  |
| Married                            | 49.7%                            | 78.3%                        |                                |
| Engaged                            | 23.6%                            | 12.5%                        |                                |
| Cohabit                            | 26.7%                            | 9.2%                         |                                |
| Relationship length                | 5.79 (5.95)                      | 9.19 (5.49)                  | $t(604.30) = -7.42, p < .001$  |
| Baseline relationship satisfaction | 9.46 (4.54)                      | 8.47 (4.61)                  | $t(626) = 2.67, p = .008$      |
| Number of children                 |                                  |                              | $\chi^2(3) = 192.04, p < .001$ |
| One child < 21                     | 20.2%                            | 26.1%                        |                                |
| More than one child < 21           | 30.6%                            | 73.9%                        |                                |
| No children                        | 41%                              | 0%                           |                                |
| All children > 21                  | 7.3%                             | 0%                           |                                |
| Household income                   |                                  |                              | $\chi^2(6) = 20.05, p = .003$  |
| less than \$5,000                  | 19.9%                            | 23.5%                        |                                |
| \$5,000 – 11,999                   | 15.4%                            | 12.9%                        |                                |
| \$12,000 – 15,999                  | 9.8%                             | 7.0%                         |                                |
| \$16,000 – 24,999                  | 19.1%                            | 10.7%                        |                                |
| \$25,000 – 34,999                  | 18.8%                            | 19.5%                        |                                |
| \$35,000 – 49,999                  | 9.3%                             | 18.0%                        |                                |
| \$50,000 and more                  | 3.7%                             | 5.1%                         |                                |
| Educational attainment             |                                  |                              | $\chi^2(7) = 4.46, p = .73$    |
| No degree                          | 5.3%                             | 5.9%                         |                                |
| GED                                | 13.2%                            | 12.1%                        |                                |
| High school diploma                | 13.2%                            | 17.3%                        |                                |
| Vocational training                | 8.1%                             | 10.3%                        |                                |
| Some college                       | 22.2%                            | 19.1%                        |                                |
| Associate's degree                 | 7.6%                             | 9.6%                         |                                |
| Bachelor's degree                  | 12.9%                            | 11.4%                        |                                |
| Master's or advanced degree        | 2.5%                             | 3.3%                         |                                |
| Employment                         |                                  |                              | $\chi^2(4) = 5.99, p = .20$    |
| Full time                          | 39.6%                            | 42.6%                        |                                |
| Part time                          | 13.5%                            | 7.7%                         |                                |
| Variable                           | 4.8%                             | 6.6%                         |                                |
| Seasonal                           | 5.9%                             | 6.3%                         |                                |
| Unemployed                         | 36.2%                            | 36.8%                        |                                |

Supplementary Table S2: *Baseline differences in demographic characteristics of coparents with and without information on COVID-19-related disruptions*

| Variable                           | Subsample with information on COVID disruptions (N = 176) | Subsample without information on COVID disruptions (N = 96) | Difference                   |
|------------------------------------|-----------------------------------------------------------|-------------------------------------------------------------|------------------------------|
| Age                                | 32.84 (6.56)                                              | 34.30 (5.89)                                                | t (270) = 1.83, p = .07      |
| Race                               |                                                           |                                                             | $\chi^2(4) = 4.43, p = .35$  |
| Non-Hispanic White                 | 62.3%                                                     | 71.9%                                                       |                              |
| Hispanic White                     | 5.7%                                                      | 3.1%                                                        |                              |
| Black                              | 16%                                                       | 15.6%                                                       |                              |
| Multiracial                        | 6.3%                                                      | 2.1%                                                        |                              |
| Other                              | 9.7%                                                      | 7.3%                                                        |                              |
| Ethnicity                          |                                                           |                                                             | $\chi^2(1) = 4.99, p = .03$  |
| Hispanic/Latino(a)                 | 4.2%                                                      | 12.5%                                                       |                              |
| Relationship status                |                                                           |                                                             | $\chi^2(2) = 3.67, p = .16$  |
| Married                            | 79.5%                                                     | 76%                                                         |                              |
| Engaged                            | 13.6%                                                     | 10.4%                                                       |                              |
| Cohabit                            | 6.8%                                                      | 13.5%                                                       |                              |
| Relationship length                | 9.51 (5.90)                                               | 8.61 (4.62)                                                 | t (237.26) = -1.38, p = .17  |
| Baseline relationship satisfaction | 9.28 (4.89)                                               | 7.00 (3.64)                                                 | t (245.17) = -4.36, p < .001 |
| Age of child                       | 3.68 (3.35)<br>range 0-15                                 | 3.57 (2.99)<br>range 0-15                                   | t (134) = -.19 p = .85       |
| Gender of child                    |                                                           |                                                             | $\chi^2(1) = 2.06, p = .15$  |
| Male                               | 45.5%                                                     | 58.3%                                                       |                              |
| Female                             | 54.5%                                                     | 41.7%                                                       |                              |
| Household income                   |                                                           |                                                             | $\chi^2(6) = 12.95, p = .04$ |
| less than \$5,000                  | 24.7%                                                     | 23.7%                                                       |                              |
| \$5,000 – 11,999                   | 13.5%                                                     | 12.9%                                                       |                              |
| \$12,000 – 15,999                  | 8.8%                                                      | 4.3%                                                        |                              |
| \$16,000 – 24,999                  | 7.1%                                                      | 18.3%                                                       |                              |
| \$25,000 – 34,999                  | 22.4%                                                     | 11.8%                                                       |                              |
| \$35,000 – 49,999                  | 18.8%                                                     | 22.6%                                                       |                              |
| \$50,000 and more                  | 4.7%                                                      | 6.5%                                                        |                              |
| Educational attainment             |                                                           |                                                             | $\chi^2(7) = 6.54, p = .48$  |
| No degree                          | 8.4%                                                      | 3.4%                                                        |                              |
| GED                                | 11%                                                       | 18.2%                                                       |                              |
| High school diploma                | 18.2%                                                     | 21.6%                                                       |                              |
| Vocational training                | 11%                                                       | 12.5%                                                       |                              |
| Some college                       | 20.8%                                                     | 22.7%                                                       |                              |
| Associate's degree                 | 12.3%                                                     | 8%                                                          |                              |
| Bachelor's degree                  | 14.3%                                                     | 10.2%                                                       |                              |
| Master's or advanced degree        | 3.9%                                                      | 3.4%                                                        |                              |
| Employment                         |                                                           |                                                             | $\chi^2(4) = 2.48, p = .65$  |
| Full time                          | 39.8%                                                     | 47.9%                                                       |                              |
| Part time                          | 8.5%                                                      | 6.3%                                                        |                              |
| Variable                           | 6.8%                                                      | 6.3%                                                        |                              |
| Seasonal                           | 5.7%                                                      | 7.3%                                                        |                              |
| Unemployed                         | 39.2%                                                     | 32.3%                                                       |                              |

Supplementary Table S3: Means, standard deviations, and correlations for and among outcome variables

|                                         | 1       | 2       | 3       | 4       | 5      | 6       | 7      | 8       | 9     | 10     | 11     | 12   |
|-----------------------------------------|---------|---------|---------|---------|--------|---------|--------|---------|-------|--------|--------|------|
| 1. Relationship satisfaction (Pre)      | –       |         |         |         |        |         |        |         |       |        |        |      |
| 2. Relationship satisfaction (Post)     | .60***  | –       |         |         |        |         |        |         |       |        |        |      |
| 3. Coparenting satisfaction (Pre)       | .47***  | .35***  | –       |         |        |         |        |         |       |        |        |      |
| 4. Coparenting satisfaction (Post)      | .31***  | .51***  | .64***  | –       |        |         |        |         |       |        |        |      |
| 5. Own gateopening behaviors (Pre)      | .22***  | .20**   | .33***  | .22**   | –      |         |        |         |       |        |        |      |
| 6. Own gateopening behaviors (Post)     | .18***  | .40***  | .25***  | .35***  | .58*** | –       |        |         |       |        |        |      |
| 7. Ptnr's gateopening behaviors (Pre)   | .39***  | .26***  | .44***  | .23**   | .56*** | .33***  | –      |         |       |        |        |      |
| 8. Ptnr's gateopening behaviors (Post)  | .25***  | .41***  | .34***  | .43***  | .34*** | .60***  | .54*** | –       |       |        |        |      |
| 9. Own gateclosing behaviors (Pre)      | -.36*** | -.18**  | -.47*** | -.23**  | -.001  | -.01    | -.13*  | -.09    | –     |        |        |      |
| 10. Own gateclosing behaviors (Post)    | -.30*** | -.41*** | -.46*** | -.35*** | -.13*  | -.25*** | -.11   | -.30*** | .61** | –      |        |      |
| 11. Ptnr's gateclosing behaviors (Pre)  | -.28*** | -.26*** | -.36*** | -.30*** | .02    | -.02    | -.16** | -.07    | .29** | .27**  | –      |      |
| 12. Ptnr's gateclosing behaviors (Post) | -.26*** | -.41*** | -.30*** | -.37*** | -.11   | -.16*   | -.20** | -.32*** | .23** | .45*** | .55*** | –    |
| <i>M</i>                                | 8.47    | 12.65   | 8.95    | 9.87    | 10.10  | 11.29   | 7.81   | 9.40    | 8.43  | 7.28   | 9.02   | 7.81 |
| <i>SD</i>                               | 4.61    | 5.12    | 2.29    | 2.06    | 4.43   | 4.13    | 4.33   | 4.72    | 3.91  | 3.41   | 4.15   | 3.75 |

Note. Ptnr = partner; *M* = mean; *SD* = standard deviation.

\*\*\*  $p < .001$ ; \*\*  $p < .01$ ; \*  $p < .05$ .

Supplementary Table S4: Results for models examining pre-post changes in relationship satisfaction and coparenting

|                       | Relationship Satisfaction       |               | Coparenting Satisfaction  |                | Own Gateopening Behaviors       |                |
|-----------------------|---------------------------------|---------------|---------------------------|----------------|---------------------------------|----------------|
|                       | B                               | 95% CI        | B                         | 95% CI         | B                               | 95% CI         |
| <i>Fixed effects</i>  |                                 |               |                           |                |                                 |                |
| Intercept             | 8.47                            | [7.79, 9.15]  | 8.95                      | [8.63, 9.26]   | 10.10                           | [9.50, 10.71]  |
| Time                  | 3.95                            | [3.32, 4.59]  | 0.86                      | [0.57, 1.15]   | 1.10                            | [0.48, 1.72]   |
| <i>Random effects</i> |                                 |               |                           |                |                                 |                |
| Sd (Intercept)        | 3.29                            | [2.72, 3.90]  | 1.47                      | [1.22, 1.74]   | 2.56                            | [2.05, 3.14]   |
| Sd (Time)             | 0.99                            | [0.09, 2.05]  | 0.18                      | [0.01, 0.51]   | 0.47                            | [0.02, 1.28]   |
| Cor (Intercept, Time) | 0.42                            | [-0.35, 0.97] | -0.13                     | [-0.95, 0.91]  | -0.29                           | [-0.97, 0.86]  |
|                       | Partner's Gateopening Behaviors |               | Own Gateclosing Behaviors |                | Partner's Gateclosing Behaviors |                |
|                       | B                               | 95% CI        | B                         | 95% CI         | B                               | 95% CI         |
| <i>Fixed effects</i>  |                                 |               |                           |                |                                 |                |
| Intercept             | 7.81                            | [7.19, 8.42]  | 8.43                      | [7.94, 8.92]   | 9.02                            | [8.48, 9.55]   |
| Time                  | 1.59                            | [0.94, 2.24]  | -1.15                     | [-1.71, -0.58] | -1.15                           | [-1.75, -0.55] |
| <i>Random effects</i> |                                 |               |                           |                |                                 |                |
| Sd (Intercept)        | 2.58                            | [2.04, 3.15]  | 1.75                      | [1.29, 2.23]   | 2.07                            | [1.59, 2.58]   |
| Sd (Time)             | 0.53                            | [0.02, 1.50]  | 0.30                      | [0.01, 0.85]   | 0.38                            | [0.02, 1.08]   |
| Cor (Intercept, Time) | 0.06                            | [-0.90, 0.94] | -0.16                     | [-0.97, 0.92]  | -0.11                           | [-0.95, 0.92]  |

Note. CI = credible interval; Sd = standard deviation; Cor = correlation; Time was coded so 0 = baseline and 1 = post; Coefficients were considered reliable if the 95% CI did not include 0.

Supplementary Table S5: *Unstandardized coefficients and 95% credible intervals for models examining the moderating effect of change in relationship satisfaction, child gender, division of childcare, and disruptions caused by the COVID-19 pandemic on changes in coparenting from pre- to post-intervention*

|                                 | Moderator                           |                |              |                |                             |                |                             |                |
|---------------------------------|-------------------------------------|----------------|--------------|----------------|-----------------------------|----------------|-----------------------------|----------------|
|                                 | Change in Relationship Satisfaction |                | Child Gender |                | Division of Childcare Labor |                | COVID-19 Related Disruption |                |
|                                 | B                                   | 95% CI         | B            | 95% CI         | B                           | 95% CI         | B                           | 95% CI         |
| Coparenting Satisfaction        |                                     |                |              |                |                             |                |                             |                |
| Intercept                       | 8.95                                | [8.63, 9.27]   | 8.64         | [8.20, 9.08]   | 8.57                        | [8.25, 8.89]   | 9.43                        | [8.91, 9.96]   |
| Time                            | 0.86                                | [0.57, 1.14]   | 0.88         | [0.47, 1.29]   | 0.98                        | [0.66, 1.29]   | 0.72                        | [0.17, 1.25]   |
| Moderator                       | -0.10                               | [-0.16, -0.04] | 0.62         | [-.00, 1.23]   | -0.72                       | [-0.94, -0.50] | -0.08                       | [-0.17, 0.02]  |
| Time*Moderator                  | 0.15                                | [0.08, 0.21]   | -0.04        | [-0.62, .53]   | 0.23                        | [-0.07, 0.52]  | 0.01                        | [-0.10, 0.12]  |
| Own Gateopening Behaviors       |                                     |                |              |                |                             |                |                             |                |
| Intercept                       | 10.11                               | [9.51, 10.71]  | 9.85         | [9.00, 10.70]  | 10.34                       | [9.69, 11.00]  | 10.28                       | [9.24, 11.32]  |
| Time                            | 1.10                                | [0.48, 1.71]   | 1.10         | [0.20, 2.01]   | 1.22                        | [0.51, 1.93]   | 1.39                        | [0.17, 2.61]   |
| Moderator                       | -0.01                               | [-0.13, 0.11]  | 0.50         | [-0.69, 1.69]  | 0.45                        | [-0.04, 0.93]  | 0.02                        | [-0.18, 0.23]  |
| Time*Moderator                  | 0.23                                | [0.09, 0.37]   | -0.00        | [-1.30, 1.28]  | 0.23                        | [-0.43, 0.88]  | -0.12                       | [-0.38, 0.13]  |
| Partner's Gateopening Behaviors |                                     |                |              |                |                             |                |                             |                |
| Intercept                       | 7.80                                | [7.19, 8.42]   | 7.24         | [6.37, 8.11]   | 7.56                        | [6.89, 8.23]   | 9.00                        | [7.92, 10.08]  |
| Time                            | 1.59                                | [0.95, 2.23]   | 1.81         | [0.88, 2.75]   | 1.63                        | [0.89, 2.38]   | 1.85                        | [0.58, 3.13]   |
| Moderator                       | -0.16                               | [-0.28, -0.04] | 1.12         | [-0.09, 2.35]  | -0.47                       | [-0.98, 0.04]  | -0.21                       | [-0.42, 0.00]  |
| Time*Moderator                  | 0.27                                | [0.13, 0.42]   | -0.44        | [-1.78, 0.91]  | 0.08                        | [-0.61, 0.77]  | -0.11                       | [-0.37, 0.15]  |
| Own Gateclosing Behaviors       |                                     |                |              |                |                             |                |                             |                |
| Intercept                       | 8.43                                | [7.93, 8.92]   | 8.68         | [7.99, 9.37]   | 9.20                        | [8.68, 9.72]   | 7.75                        | [6.92, 8.57]   |
| Time                            | -1.15                               | [-1.70, -0.58] | -1.05        | [-1.86, -0.24] | -1.30                       | [-1.92, -0.69] | -1.11                       | [-2.12, -0.08] |
| Moderator                       | 0.22                                | [0.11, 0.33]   | -0.50        | [-1.46, 0.47]  | 1.46                        | [1.04, 1.88]   | -0.16                       | [-0.01, 0.33]  |
| Time*Moderator                  | -0.24                               | [-0.36, -0.11] | -0.18        | [-1.35, 0.97]  | -0.30                       | [-0.86, 0.26]  | -0.02                       | [-0.23, 0.19]  |
| Partner's Gateclosing Behaviors |                                     |                |              |                |                             |                |                             |                |
| Intercept                       | 9.02                                | [8.49, 9.55]   | 9.60         | [8.85, 10.35]  | 9.08                        | [8.49, 9.66]   | 9.29                        | [8.36, 10.22]  |
| Time                            | -1.15                               | [-1.75, -0.55] | -1.58        | [-2.42, -0.73] | -1.12                       | [-1.81, -0.42] | -1.86                       | [-2.94, -0.79] |
| Moderator                       | 0.05                                | [-0.06, 0.16]  | -1.15        | [-2.21, -0.10] | 0.12                        | [-0.35, 0.59]  | -0.14                       | [-0.32, 0.05]  |
| Time*Moderator                  | -0.17                               | [-0.31, -0.03] | 0.86         | [-0.36, 2.07]  | 0.07                        | [-0.59, 0.72]  | 0.22                        | [0.00, 0.44]   |

*Note.* CI = credible interval; Time was coded so 0 = baseline and 1 = post; Random effects in intercept and effect of time were modelled but not reported in the table (stats available on the Open Science Framework); Coefficients were considered reliable and meaningful if the 95% CI did not include 0; Time\*Moderator effects were the main effects of interest. If the corresponding 95% CI did not include 0, it indicated that the extent to which pre-post improvements in coparenting differed reliably as a function of the level of the corresponding moderator.
